tion at this dose level of AY 6204, 2 mg./kg., diminished after 30 to 60 minutes. Depression of arterial pressure and pulse rate due to the AY 6204 was minimal and found not to be statistically significant. Both animals who breathed spontaneously attained arterial  $P_{CO_2}$  levels between 73 and 79 mm. of mercury. The eight who were artificially ventilated did not exceed 45 mm. of mercury. Halothane levels varied widely from one dog to another but in six a steady state was maintained throughout the period of testing. *Discussion:* This particular dosage of the blocking agent was used because it had been shown to produce little hemodynamic depression. It afforded at least a twofold protection against exogenous epinephrine during halothane anesthesia in dogs. More information should be obtained about its intrinsic effects upon the cardiovascular system subjected to the stress of hemorrhage and anesthesia. (Supported in part by N.I.H. Grant GSR 1963-13.)

**Apneic Oxygenation Following Respiration with Air or Nitrous Oxide-Oxygen Mixture.** M. L. HELLER, M.D., T. R. WATSON, JR., M.D., and D. S. IMREY, Ph.D., *Hitchcock Clinic and Dartmouth Medical School, Hanover, New Hampshire.* In a recent polarographic  $P_{O_2}$  study we observed that after preliminary oxygenation followed by apnea there was a marked difference in the rate of arterial deoxygenation, depending on whether the airway was open to room air or attached to an oxygen reservoir. The arterial oxygen tension fell rapidly in the former situation, whereas  $P_{O_2}$  values greater than 400 mm. of mercury were noted after five minutes of apnea when there was mass flow of oxygen down the airway (to be published in ANESTHESIOLOGY). In the present investigation apneic oxygenation was studied in man without preliminary oxygenation. *Method:* Several patients under anesthesia in preparation for surgery were ventilated first with (1) air followed by apnea, and subsequently (2) with a gas mixture of 80 per cent  $N_2O$ -20 per cent  $O_2$ , also followed by apnea. Arterial blood samples were withdrawn at one-half to one minute intervals and measured for oxygen tension with our laboratory polarograph (New Engl. J. Med. 264: 326, 1961). *Results:*

When apnea follows air breathing the arterial  $P_{O_2}$  fell rapidly to hypoxic levels no matter whether the airway was connected to a source of oxygen or open to air. It appears that when the alveolar space contains an original high nitrogen concentration there was very little mass flow of ambient gas (oxygen or nitrogen) down the airway. On the other hand, arterial oxygenation was quite different when patients were ventilated for a few minutes with an 80-20 nitrous oxide-oxygen mixture prior to apnea. In this situation when the endotracheal tube was attached to a reservoir bag filled with oxygen, the arterial oxygen tension showed no fall; or it actually demonstrated a small increase during the ventilatory period. Apparently oxygen molecules moved down the airway. *Discussion:* The underlying mechanism may be explained as follows: nitrous oxide molecules are readily taken up by the pulmonary capillary blood (until equilibrium is established) and removed from the alveolar space. This produces a lowering of the alveolar barometric pressure, and a pressure gradient is established between the airway opening and the alveoli. A mass flow of ambient gas occurs. If the atmosphere is oxygen, alveolar  $P_{O_2}$  is kept at an adequate level. When the atmosphere is air, the existing alveolar oxygen is diluted by the added nitrogen and the oxygen tension falls. This phenomenon is another physiological example of induced mass inflow of gas during apnea. However, there is a difference in the mechanism of the airway pressure gradient as described in this study in comparison with that of "diffusion oxygenation" (or more correctly "apneic oxygenation") of Draper and Whitehead (Anesth. Analg. 28: 307, Nov. 1949). *Conclusion:* In this earlier classical description, mass flow of gas results from the difference in carbon dioxide excretion and oxygen uptake. In our present study the lowering of the alveolar barometric pressure was due to the rapid uptake of the relatively soluble nitrous oxide.

**The Acid-Base "Lesion" of Bank Blood.** W. S. HOWLAND, M.D., and O. SCHWEIZER, M.D., *Department of Anesthesiology, Memorial Hospital For Cancer and Allied Diseases, New York City.* For many years the deleterious
